# Supplementary material for: Widening geographic range of Rift Valley fever disease clusters associated with climate change in East Africa
Source: bioRxiv or medRxiv preprint supplement (doi:10.1101/2024.05.17.24307534), 2024-05-17
Supplement: Supplementary file [file media-1.pdf]

**Supplementary Table I.** Predictor variables of Rift Valley Fever disease cluster occurrence analyzed.

|    | <b>Variable</b>                                        | <b>Units</b>                |
|----|--------------------------------------------------------|-----------------------------|
| 1  | Country                                                | NA                          |
| 2  | Region                                                 | NA                          |
| 3  | County or District                                     | NA                          |
| 4  | Year of outbreak                                       | Year                        |
| 5  | Month of outbreak                                      | Month                       |
| 6  | History of absence of previous outbreak                | NA                          |
| 7  | History of previous outbreaks                          | NA                          |
| 8  | <i>Land factors</i>                                    |                             |
| 9  | Soil type                                              | NA                          |
| 10 | Altitude                                               | Meters                      |
| 11 | Elevation below 1000 m                                 | Meters                      |
| 12 | Presence of land use changes                           | NA                          |
| 13 | Types of land use changes                              | NA                          |
| 14 | Presence of significant water pools                    | NA                          |
| 15 | Causes of significant water pools                      | NA                          |
| 16 | <i>Animal factors</i>                                  |                             |
| 17 | Predominant livestock species                          | NA                          |
| 18 | Type of Livestock production system                    | NA                          |
| 19 | Host density                                           | Population/ Km <sup>2</sup> |
| 20 | Proximity to wildlife                                  | Km                          |
| 21 | <i>Climate data</i>                                    |                             |
| 22 | Annual rainfall 3 years prior to the outbreak          | mm                          |
| 23 | Annual rainfall 2 years prior to the outbreak          | mm                          |
| 24 | Annual rainfall for the year preceding the outbreak    | mm                          |
| 25 | Annual rainfall of the outbreak year                   | mm                          |
| 26 | Monthly rainfall for the outbreak month                | mm                          |
| 27 | Monthly rainfall 1 month prior to the outbreak         | mm                          |
| 28 | Monthly rainfall 2 months prior to the outbreak        | mm                          |
| 29 | Monthly rainfall 3 months prior to the outbreak        | mm                          |
| 30 | Annual temperature 3 years prior to the outbreak       | °Celsius                    |
| 31 | Annual temperature 2 years prior to the outbreak       | °Celsius                    |
| 32 | Annual temperature for the year preceding the outbreak | °Celsius                    |
| 33 | Annual temperature of the outbreak year                | °Celsius                    |
| 34 | Monthly temperature for the outbreak month             | °Celsius                    |
| 35 | Monthly temperature 1 month prior to the outbreak      | °Celsius                    |
| 36 | Monthly temperature 2 months prior to the outbreak     | °Celsius                    |
| 37 | Monthly temperature 3 months prior to the outbreak     | °Celsius                    |
| 38 | Annual humidity 3 years prior to the outbreak          | %                           |
| 39 | Annual humidity 2 years prior to the outbreak          | %                           |
| 40 | Annual humidity for the year preceding the outbreak    | %                           |
| 41 | Annual humidity for the year of the outbreak           | %                           |

|    |                                                 |    |
|----|-------------------------------------------------|----|
| 42 | Monthly humidity for the outbreak month         | %  |
| 43 | Monthly humidity 1 month prior to the outbreak  | %  |
| 44 | Monthly humidity 2 months prior to the outbreak | %  |
| 45 | Monthly humidity 3 months prior to the outbreak | %  |
| 46 | Outbreak month NDVI                             | NA |
| 47 | Monthly NDVI 1 month prior to the outbreak      | NA |
| 48 | Monthly NDVI 2 months prior to the outbreak     | NA |
| 49 | Monthly NDVI 3 months prior to the outbreak     | NA |

---
