# Supplementary material for: Widening geographic range of Rift Valley fever disease clusters associated with climate change in East Africa
Source: bioRxiv or medRxiv preprint supplement (doi:10.1101/2024.05.17.24307534), 2024-05-17
Supplement: Supplementary file [file media-2.pdf]

**Supplement Table II.** Univariate analysis of drivers of RVF clusters in East Africa, 2008 –2022

| Variable                                                                    | Coefficient | IRR           | 95% CI        | S.E     | p-value |
|-----------------------------------------------------------------------------|-------------|---------------|---------------|---------|---------|
| <b>Country*</b>                                                             |             |               |               |         |         |
| <i>Kenya (Intercept)</i>                                                    | -3.86       | -             | 0.01, 0.03    | 0.19    | <0.001  |
| <i>Uganda</i>                                                               | -1.55       | 0.21          | 0.12, 0.38    | 0.28    | <0.001  |
| <i>Tanzania</i>                                                             | 0.90        | 2.46          | 1.14, 5.66    | 0.39    | 0.02*   |
| <b>Livestock production system*</b>                                         |             |               |               |         |         |
| <i>Extensive (Intercept)</i>                                                | -3.41       | -             | 0.02, 0.05    | 0.22    | <0.001  |
| <i>Intensive</i>                                                            | -0.63       | 0.531         | 1.13, 3.93    | 0.35    | 0.06    |
| <i>Semi-intensive</i>                                                       | -1.89       | 0.150         | 1.08, 1.32    | 0.31    | <0.001  |
| <b>Elevation level*</b>                                                     |             |               |               |         |         |
| <i>High (&gt; 1000m) (Intercept)</i>                                        | -5.17       | -             | 0.004, 0.008  | 0.15    | <0.001  |
| <i>Low (&lt;500m)</i>                                                       | 2.29        | 9.96          | 5.81, 17.60   | 0.27    | <0.001  |
| <i>Medium (500 - 1000m)</i>                                                 | 0.47        | 1.61          | 0.68, 4.15    | 0.44    | 0.28    |
| <b>Rainfall prior to outbreak (mm)</b>                                      |             |               |               |         |         |
| 3 <sup>rd</sup> month                                                       | 0.22        | 1.25          | 1.16, 1.34    | 0.0385  | <0.001  |
| 2 <sup>nd</sup> month                                                       | 0.22        | <b>1.24</b>   | 1.15, 1.34    | 0.0411  | <0.001  |
| 1 <sup>st</sup> month                                                       | 0.18        | <b>1.19</b>   | 1.11, 1.30    | 0.0458  | <0.001  |
| Outbreak month                                                              | 0.21        | <b>1.2438</b> | 1.13, 1.36    | 0.0523  | <0.001  |
| Humidity outbreak month                                                     | 0.04        | <b>1.04</b>   | 1.01, 1.08    | 0.01751 | 0.01*   |
| <b>Positive change in NDVI (1<sup>st</sup>month prior)</b>                  |             |               |               |         |         |
| <i>No (Intercept)</i>                                                       | -           | -             |               | -       | -       |
| <i>Yes</i>                                                                  | 0.31        | <b>1.36</b>   | 0.71, 2.60    | 0.31    | 0.32    |
| <b>NDVI change between 2<sup>nd</sup> month prior &amp; outbreak month*</b> |             |               |               |         |         |
| <i>No (Intercept)</i>                                                       | -           | -             |               | -       | -       |
| <i>Yes</i>                                                                  | 4.60        | <b>99.74</b>  | 13.01, 812.40 | 0.97    | <0.001  |

*Note S.E= standard error, IRR = incident rate, significant variables are in bold*
