# Supplementary material for: Widening geographic range of Rift Valley fever disease clusters associated with climate change in East Africa
Source: bioRxiv or medRxiv preprint supplement (doi:10.1101/2024.05.17.24307534), 2024-05-17
Supplement: Supplementary file [file media-3.pdf]

**Supplement Table III.** Multivariate negative binomial regression analysis of RVF cluster drivers in East Africa, 2008 –2022

| <b>Factor</b>                                                                    | <b>Coefficient</b> | <b>IRR</b> | <b>95% CI</b> | <b>S.E</b> | <b>p-value</b>   |
|----------------------------------------------------------------------------------|--------------------|------------|---------------|------------|------------------|
| <i>Intercept</i>                                                                 | -11.15             | -          | -             | 1.39       | <0.001           |
| Tanzania                                                                         | 0.79               | 2.21       | 1.01, 5.20    | 0.39       | <b>0.04 *</b>    |
| Uganda                                                                           | -1.22              | 0.29       | 0.16, 0.53    | 0.29       | <b>&lt;0.001</b> |
| Temperature (3 <sup>rd</sup> month prior)                                        | 0.18               | 1.20       | 1.11, 1.29    | 0.04       | <b>&lt;0.001</b> |
| Positive NDVI change (1 month prior)                                             | 0.58               | 1.79       | 1.00, 3.25    | 0.28       | <b>0.03 *</b>    |
| First month prior NDVI                                                           | 1.59               | 4.9        | 0.93, 26.52   | 0.81       | <b>0.04 *</b>    |
| Deviance                                                                         | -                  | -          | DF            | -          | -                |
| Null Deviance                                                                    | 161.50             |            | 83            | -          | -                |
| Residual Deviance                                                                | 83.69              |            | 78            | -          | -                |
| Dispersion parameter                                                             | 1.03               |            | -             | -          | -                |
| AIC                                                                              | 449.55             |            | -             | -          | -                |
| 2 x log-likelihood                                                               | -435.55            |            | -             | -          | -                |
| <i>Theta: 1.028; Std. Err.: 0.174, 0 **** 0.001 *** 0.01 ** 0.05 ' 0.1 ' ' 1</i> |                    |            |               |            |                  |
